# Supplementary material for: Major Families of Multiresistant Plasmids from Geographically and Epidemiologically Diverse Staphylococci
Source: PubMed Central journal article supplement (PMC3276174; doi:10.1534/g3.111.000760), 2011-12-01
Supplement: supp_1.7.581_000760SI.pdf [file supp_1.7.581_000760SI.pdf]

**Table S1 Strain collections used in this work**

| Strain collection  | Source                                                    | Description                                          | Number screened |
|--------------------|-----------------------------------------------------------|------------------------------------------------------|-----------------|
| NARSA <sup>a</sup> | NARSA <sup>a</sup> , US                                   | Human clinical                                       | 10              |
| CDC <sup>b</sup>   | Centers for Disease Control and Prevention, US            | Human clinical                                       | 64 <sup>b</sup> |
| Veterinary         | University of Georgia, GA, US                             | Companion animal                                     | 14              |
| Poultry            | University of Georgia, GA, US                             | Poultry litter                                       | 8               |
| Nebraska           | University of Nebraska Medical Center, NE, US             | Human clinical                                       | 51              |
| Western Australia  | Curtin University of Technology, Perth, Western Australia | Human clinical                                       | 35              |
| United Kingdom     | University of London, London, UK                          | Human and animal clinical, screenings and infections | 65              |
| Historic           | University of Sydney, Sydney, AU                          | Human clinical                                       | 29              |
| <b>Total</b>       |                                                           |                                                      | <b>280</b>      |

<sup>a</sup> Network on Antimicrobial Resistance in *Staphylococcus aureus* (NARSA) (<http://www.narsa.net>)

<sup>b</sup> There were four additional transconjugant strains with plasmids from human clinical strains in this collection (McDougal *et al.* 2008).

**Table S2 Strain information and restriction types for *Staphylococcus* (and two *Enterococcus*) plasmid sequences obtained.<sup>a</sup>**

| Accession | Plasmid | Size  | Strain   | Species             | Plasmid Genotype <sup>b</sup>                                                                      | RT    | Sequence | Year | Location        | Status                                | Other strain info <sup>c</sup> | Plasmid phenotype <sup>d</sup> | Identified by                                                                                                                                                                                                                                                        |
|-----------|---------|-------|----------|---------------------|----------------------------------------------------------------------------------------------------|-------|----------|------|-----------------|---------------------------------------|--------------------------------|--------------------------------|----------------------------------------------------------------------------------------------------------------------------------------------------------------------------------------------------------------------------------------------------------------------|
| GQ900386  | SAP020A | 64909 | CDC3     | <i>S. sp. (CNS)</i> | <i>bin, repA</i> , Type Ib partitioning                                                            | RT44  | complete | 1996 | GA, USA         | human clinical isolate                | OxS                            |                                | Jean Patel, Ainsley Nicholson, Brandi Limbago: Division of Healthcare Quality Promotion, Centers for Disease Control and Prevention, Atlanta, GA, USA<br>Jodi Lindsay. Department of Cellular and Molecular Medicine, St. George's, University of London, London, UK |
| GQ900421  | SAP068A | 50500 | PM64     | <i>S. aureus</i>    | <i>aacA-aphD, dfr, tcaA, tra, res, Tn552, IS256 x2, repA</i> , Type II partitioning                | RT83  | complete | 1999 | SGH, London, UK | clinical, hospital-acquired infection | HA-MRSA                        |                                | Jean Patel, Ainsley Nicholson, Brandi Limbago: Division of Healthcare Quality Promotion, Centers for Disease Control and Prevention, Atlanta, GA, USA                                                                                                                |
| GQ900379  | SAP014A | 50429 | CDC58    | <i>S. aureus</i>    | <i>tra, res, aacA-aphD, IS256 x2, tcaA, tet, pre, dfr, ble, kan, repA</i> , Type II partitioning   | RT47  | complete | 2000 | MS, USA         | human clinical isolate                | HA-MRSA                        |                                | Jean Patel, Ainsley Nicholson, Brandi Limbago: Division of Healthcare Quality Promotion, Centers for Disease Control and Prevention, Atlanta, GA, USA                                                                                                                |
| GQ900432  | SAP079A | 47322 | CDCGA672 | <i>S. aureus</i>    | <i>tra, res, aacA-aphD, IS256 x2, tcaA, kan, multidrug resistance, repA</i> , Type II partitioning | RT112 | complete |      | GA, USA         | human clinical isolate                |                                |                                | Jean Patel, Ainsley Nicholson, Brandi Limbago: Division of Healthcare Quality Promotion, Centers for Disease Control and Prevention, Atlanta, GA, USA                                                                                                                |

and Prevention,  
Atlanta, GA, USA

Ron Skurray, Neville  
Firth, Slade Jensen:  
School of Biological  
Sciences, University  
of Sydney, Sydney,  
AU

Jean Patel, Ainsley  
Nicholson, Brandi  
Limbago: Division of  
Healthcare Quality  
Promotion, Centers  
for Disease Control  
and Prevention,  
Atlanta, GA, USA

Jean Patel, Ainsley  
Nicholson, Brandi  
Limbago: Division of  
Healthcare Quality  
Promotion, Centers  
for Disease Control  
and Prevention,  
Atlanta, GA, USA

Jean Patel, Ainsley  
Nicholson, Brandi  
Limbago: Division of  
Healthcare Quality  
Promotion, Centers  
for Disease Control  
and Prevention,  
Atlanta, GA, USA

|          |         |       |           |                                 |                                                                                                                                                                                              |       |          |      |                         |                              |           |
|----------|---------|-------|-----------|---------------------------------|----------------------------------------------------------------------------------------------------------------------------------------------------------------------------------------------|-------|----------|------|-------------------------|------------------------------|-----------|
| GQ900448 | pSK156  | 45052 | SK1271    | <i>S. aureus</i>                | <i>cadXD</i> , antiseptic<br>resistance, <i>sin</i> , $\Delta$ Tn552,<br><i>se</i> , bacteriocin, <i>repA</i> , <i>par</i>                                                                   | RT97  | complete | 1951 | Melbourne,<br>Australia | human<br>clinical<br>isolate | AsaPcQacB |
| GQ900434 | SAP082A | 44116 | CDCPANICU | <i>S. aureus</i>                | <i>tra</i> , <i>res</i> , <i>kan</i> , <i>tcaA</i> , IS256<br>x2, <i>aacA-aphD</i> , multidrug<br>efflux, <i>repA</i> , Type II<br>partitioning                                              | RT115 | complete |      | PA, USA                 | human<br>clinical<br>isolate |           |
| GQ900433 | SAP080A | 43892 | CDCTN147  | <i>S. aureus</i>                | <i>tra</i> , <i>res</i> , <i>ble</i> , <i>kan</i> , IS256 x2,<br><i>aacA-aphD</i> , <i>tcaA</i> , <i>dfr</i> ,<br><i>repA</i> , Type II partitioning                                         | RT113 | complete |      | TN, USA                 | human<br>clinical<br>isolate |           |
| GQ900381 | SAP016A | 43807 | CDC8      | <i>S.</i><br><i>epidermidis</i> | <i>aacA-aphD</i> , <i>ble</i> , <i>kan</i> ,<br>multidrug efflux, <i>mob</i> ,<br><i>pre</i> , <i>res</i> , <i>tcaA</i> , $\Delta$ Tn552,<br>IS256 x2, <i>repA</i> , <i>rep</i> , <i>par</i> | RT51  | complete | 1999 | CA, USA                 | human<br>clinical<br>isolate | OxS       |

|          |         |       |       |                       |                                                                                                        |       |          |      |                          |                                       |                    |                                                                                                                                                                                                                          |
|----------|---------|-------|-------|-----------------------|--------------------------------------------------------------------------------------------------------|-------|----------|------|--------------------------|---------------------------------------|--------------------|--------------------------------------------------------------------------------------------------------------------------------------------------------------------------------------------------------------------------|
| GQ900456 | SAP107A | 42623 | SK30  | <i>S. epidermidis</i> | <i>bin, cadXD</i> , multidrug efflux, <i>asp/sec, repA</i> , Type Ib partitioning                      | RT106 | complete | 1980 | Melbourne, Australia     | human clinical isolate                |                    | Ron Skurray, Neville Firth, Slade Jensen: School of Biological Sciences, University of Sydney, Sydney, AU<br>Jodi Lindsay. Department of Cellular and Molecular Medicine, St. George's, University of London, London, UK |
| GQ900422 | SAP069A | 42198 | PM79  | <i>S. aureus</i>      | <i>tra, res, IS256 x2, aacA-aphD, kan, tcaA</i> , multidrug efflux, <i>repA</i> , Type II partitioning | RT41  | complete | 1999 | SGH, London, UK          | clinical, hospital-acquired infection | HA-MRSA            | Jodi Lindsay. Department of Cellular and Molecular Medicine, St. George's, University of London, London, UK                                                                                                              |
| GQ900415 | SAP057A | 39308 | 3049  | <i>S. aureus</i>      | <i>cadXD, etb</i> , bacteriocin, <i>exo, pls, repA</i> , Type Ib partitioning                          | RT26  | complete | 1999 | Oxford, UK               | not from infection                    | MSSA               | Ron Skurray, Neville Firth, Slade Jensen: School of Biological Sciences, University of Sydney, Sydney, AU                                                                                                                |
| GQ900454 | SAP106A | 38556 | SK939 | <i>S. epidermidis</i> | <i>ars, mob, sin, ΔTn552</i> , bacteriocin/lantibiotic, <i>repA, rep</i> , Type Ib partitioning        | RT104 | complete | 1946 | Melbourne, Australia     | human clinical isolate                |                    | Frances O'Brien. School of Biomedical Sciences, Curtin University of Technology, Perth, Western Australia                                                                                                                |
| GQ900389 | pWBG745 | 38204 | WB43S | <i>S. aureus</i>      | <i>tra</i> (incomplete), <i>repA</i> , Type Ib partitioning                                            | RT11  | complete | 2001 | Remote Western Australia | screening                             | ST73-MRSA-IVa (2B) | University of Western Australia                                                                                                                                                                                          |

Frances O'Brien.  
 School of Biomedical  
 Sciences, Curtin  
 University of  
 Technology, Perth,  
 Western Australia  
 Frances O'Brien.  
 School of Biomedical  
 Sciences, Curtin  
 University of  
 Technology, Perth,  
 Western Australia  
 Jean Patel, Ainsley  
 Nicholson, Brandi  
 Limbago: Division of  
 Healthcare Quality  
 Promotion, Centers  
 for Disease Control  
 and Prevention,  
 Atlanta, GA, USA  
 Jodi Lindsay.  
 Department of  
 Cellular and  
 Molecular Medicine,  
 St. George's,  
 University of  
 London, London, UK  
 Jodi Lindsay.  
 Department of  
 Cellular and  
 Molecular Medicine,  
 St. George's,  
 University of

|          |         |       |         |                       |                                                                                                                                                                              |      |          |      |                                |                              |                      |
|----------|---------|-------|---------|-----------------------|------------------------------------------------------------------------------------------------------------------------------------------------------------------------------|------|----------|------|--------------------------------|------------------------------|----------------------|
| GQ900391 | pWBG749 | 38087 | WBG8381 | <i>S. aureus</i>      | <i>tra</i> (incomplete), <i>repA</i> ,<br>Type Ib partitioning                                                                                                               | RT10 | complete | 1995 | Remote<br>Western<br>Australia | screening                    | ST5-MRSA-IVa<br>(2B) |
| GQ900400 | pWBG758 | 38045 | Y74T    | <i>S. aureus</i>      | only phage genes                                                                                                                                                             | RT16 | complete | 1996 | Remote<br>Western<br>Australia | screening                    | ST761-MSSA           |
| GQ900402 | SAP045A | 37564 | CDC9    | <i>S. epidermidis</i> | <i>bla</i> , bacitracin, multidrug<br>resistance, <i>sin</i> , <i>repA</i> , <i>par</i>                                                                                      | RT62 | complete | 2000 | FL, USA                        | human<br>clinical<br>isolate | OxS                  |
| GQ900427 | SAP076A | 35114 | PM86    | <i>S. aureus</i>      | <i>ars</i> , <i>bin</i> , <i>cadCA</i> , <i>pre</i> , <i>sin</i> ,<br>metal transporting<br>ATPase, <i>repA</i> , <i>rep</i> , <i>par</i>                                    | RT30 | complete | 1999 | SGH, London,<br>UK             | not from<br>infection        | HA-MRSA              |
| GQ900428 | SAP077A | 35510 | 879R4RF | <i>S. aureus</i>      | <i>ars</i> , <i>bin</i> , <i>cadCA</i> , <i>pre</i> , <i>sin</i> ,<br>metal transporting<br>ATPase, biofilm-<br>associated protein, <i>repA</i> ,<br><i>rep</i> , <i>par</i> | RT31 | complete | 1982 | USA                            | not from<br>infection        | MSSA                 |

London, London, UK

Jodi Lindsay.  
Department of  
Cellular and  
Molecular Medicine,  
St. George's,  
University of  
London, London, UK  
Frances O'Brien.  
School of Biomedical  
Sciences, Curtin  
University of  
Technology, Perth,  
Western Australia  
Frances O'Brien.  
School of Biomedical  
Sciences, Curtin  
University of  
Technology, Perth,  
Western Australia  
Alexander Mankin:  
Center for  
Pharmaceutical  
Biotechnology,  
University of Illinois,  
Chicago, IL, USA  
Susan Sanchez:  
Department of  
Infectious Diseases,  
College of  
Veterinary  
Medicine, University

|          |         |       |                   |                  |                                                                                          |      |          |      |                                |                                                      |                              |
|----------|---------|-------|-------------------|------------------|------------------------------------------------------------------------------------------|------|----------|------|--------------------------------|------------------------------------------------------|------------------------------|
| GQ900430 | SAP078A | 35508 | A78R1             | <i>S. aureus</i> | <i>ars, bin, cadCA, pre, sin,</i><br>metal transporting<br><i>ATPase, repA, rep, par</i> | RT31 | complete | 2007 | UK                             | not from<br>infection                                | MRSA                         |
| GQ900390 | pWBG746 | 33702 | WB43S             | <i>S. aureus</i> | <i>cadXD, sin, se, bacteriocin,</i><br><i>exo, repA, par</i>                             | RT12 | complete | 2001 | Remote<br>Western<br>Australia | screening                                            | ST73-MRSA-IVa<br>(2B)        |
| GQ900399 | pWBG747 | 33701 | K153N             | <i>S. aureus</i> | <i>cadXD, se, bacteriocin,</i><br><i>exo, sin, repA, par</i>                             | RT12 | complete | 1995 | Remote<br>Western<br>Australia | screening                                            | ST73-MSSA                    |
| GQ900387 | pCM05   | 33660 | CM05              | <i>S. aureus</i> | <i>ars, cadCA, cadXD, mer,</i><br><i>sin x2, Tn552, bin, repA,</i><br><i>par</i>         | RT84 | complete | 2005 | Medellin,<br>Colombia          | human<br>clinical<br>pneumonia<br>isolate,<br>sputum | ST5-MRSA-mec I               |
| GQ900382 | SAP017A | 32650 | VET A0-<br>49420c | <i>S. aureus</i> | <i>aacA-aphD, dfr, cadXD,</i><br><i>Tn552Δ, blaZ, IS256 x3,</i><br><i>repA, par</i>      | RT63 | complete | 2000 | Hendersonville<br>Co, NC, USA  | equine<br>abscess<br>isolate                         | USA500 t064<br>ST250-mec IVa |

of Georgia, Athens,  
GA, USA

Jean Patel, Ainsley  
Nicholson, Brandi  
Limbago: Division of  
Healthcare Quality  
Promotion, Centers  
for Disease Control  
and Prevention,  
Atlanta, GA, USA  
Kenneth Bayles:  
Department of  
Pathology and  
Microbiology,  
University of  
Nebraska Medical  
Center, Omaha, NE,  
USA

Jodi Lindsay.  
Department of  
Cellular and  
Molecular Medicine,  
St. George's,  
University of  
London, London, UK  
Frances O'Brien.  
School of Biomedical  
Sciences, Curtin  
University of  
Technology, Perth,  
Western Australia

|          |         |       |         |                     |                                                                                                                                                        |                       |          |      |                                |                                                 |                      |
|----------|---------|-------|---------|---------------------|--------------------------------------------------------------------------------------------------------------------------------------------------------|-----------------------|----------|------|--------------------------------|-------------------------------------------------|----------------------|
| GQ900383 | SAP018A | 32487 | CDC25   | <i>S. sp. (CNS)</i> | <i>aacA-aphD, dfr, mob,</i><br>putative nickase, $\Delta$ Tn552,<br><i>sin, IS256 x2, repA, rep,</i><br><i>par</i>                                     | RT65                  | complete | 2001 | AR, USA                        | human<br>clinical<br>isolate                    | OxR                  |
| GQ900412 | SAP052A | 32445 | NE 3885 | <i>S. aureus</i>    | <i>cadXD, sin, <math>\Delta</math>Tn552, aph,</i><br><i>sta, aad, bacitracin</i><br>resistance, <i>mac, ery,</i><br>multidrug efflux, <i>repA, par</i> | RT6<br>(RT3-<br>like) | complete | 2007 | NE, USA                        | human<br>clinical<br>isolate,<br>wound          |                      |
| GQ900419 | SAP064A | 30857 | EMRSA-3 | <i>S. aureus</i>    | <i>cadCA, cadXD, mer,</i><br>antiseptic resistance,<br>$\Delta$ Tn552, <i>sin, repA, par</i>                                                           | RT35                  | complete | 1987 | UK                             | clinical,<br>hospital-<br>acquired<br>infection | HA-MRSA              |
| GQ900395 | pWBG753 | 30047 | WBG7583 | <i>S. aureus</i>    | <i>cadCA, tet, Tn552, sin,</i><br><i>pre, repA, par</i>                                                                                                | RT14                  | complete | 1995 | Remote<br>Western<br>Australia | screening                                       | ST8-MRSA-IVa<br>(2B) |

Kenneth Bayles:  
Department of  
Pathology and  
Microbiology,  
University of  
Nebraska Medical  
Center, Omaha, NE,  
USA

Kenneth Bayles:  
Department of  
Pathology and  
Microbiology,  
University of  
Nebraska Medical  
Center, Omaha, NE,  
USA

Frances O'Brien.  
School of Biomedical  
Sciences, Curtin  
University of  
Technology, Perth,  
Western Australia  
Ron Skurray, Neville  
Firth, Slade Jensen:  
School of Biological  
Sciences, University  
of Sydney, Sydney,  
AU

|          |         |       |         |                  |                                                                                                             |                |          |          |                          |                                        |           |
|----------|---------|-------|---------|------------------|-------------------------------------------------------------------------------------------------------------|----------------|----------|----------|--------------------------|----------------------------------------|-----------|
| GQ900388 | SAP027A | 29646 | NE 3828 | <i>S. aureus</i> | <i>cadXD, sin, ΔTn552, aph, sta, aad, bacitracin resistance, mac, ery, antiseptic resistance, repA, par</i> | RT7 (RT3-like) | complete | 2006     | NE, USA                  | human clinical isolate, wound          |           |
| GQ900378 | pl258   | 29254 | NRS128  | <i>S. aureus</i> | <i>ars, cadCA, mer, sin, ΔTn552, mac-linc-str-ery, repA, par</i>                                            | RT66           | complete | pre-1963 |                          |                                        |           |
| GQ900405 | SAP047A | 28974 | NE 3008 | <i>S. aureus</i> | <i>cadXD, sin, ΔTn552, pre, ser, sej, ses, set, repA, rep, par</i>                                          | RT4            | complete | 2005     | NE, USA                  | human clinical isolate, synovial fluid |           |
| GQ900401 | pWBG759 | 28384 | C57S    | <i>S. aureus</i> | <i>cadXD, sin, ΔTn552, sdrE, repA, par</i>                                                                  | RT19           | complete | 1995     | Remote Western Australia | screening                              | ST20-MSSA |
| GQ900447 | pSK67   | 27439 | SK1027  | <i>S. aureus</i> | <i>cadXD, ser, sej, sed, sin, ΔTn552, repA, par</i>                                                         | RT2            | complete | 1949     | Melbourne, Australia     | human clinical isolate                 | CdPc      |
| GQ900385 | SAP019A | 27435 | NRS104  | <i>S. aureus</i> | <i>ars, cadCA, bin, sin, pre, bacteriocin, metal</i>                                                        | RT73           | complete | 1935     | USA                      |                                        |           |



|          |         |       |               |                       |                                                                                      |       |          |      |                      |                               |                         |
|----------|---------|-------|---------------|-----------------------|--------------------------------------------------------------------------------------|-------|----------|------|----------------------|-------------------------------|-------------------------|
| GQ900380 | SAP015A | 27068 | CDC61         | <i>S. aureus</i>      | <i>cadXD, sin, ΔTn552, aph, sta, aad, bacitracin resistance, mac, ery, rep, par</i>  | RT3   | complete | 2002 | CA, USA              | human clinical isolate        | HA-MRSA                 |
| GQ900403 | SAP046A | 27068 | VET A6-001648 | <i>S. aureus</i>      | <i>cadXD, sin, ΔTn552, aph, sta, aad, bacitracin resistance, mac, ery, repA, par</i> | RT3   | complete | 2005 | Clarke Co, GA, USA   | canine abscess isolate        | USA300 t008 ST8-ORSA-IV |
| GQ900409 | SAP050A | 27067 | NE 3874       | <i>S. aureus</i>      | <i>cadXD, sin, ΔTn552, aph, sta, aad, bacitracin resistance, mac, ery, repA, par</i> | RT3   | complete | 2007 | NE, USA              | human clinical isolate, wound |                         |
| GQ900452 | SAP105A | 26236 | SK933         | <i>S. epidermidis</i> | <i>cadCA, cadXD, mer, sin, bacteriocin, repA, par</i>                                | RT102 | complete | 1946 | Melbourne, Australia | human clinical isolate        |                         |
| GQ900418 | SAP063A | 26016 | EMRSA-2       | <i>S. aureus</i>      | <i>cadXD, ΔTn552, sin, repA, par</i>                                                 | RT34  | complete | 1987 | UK                   | clinical, hospital-acquired   | HA-MRSA                 |

Jean Patel, Ainsley Nicholson, Brandi Limbago: Division of Healthcare Quality Promotion, Centers for Disease Control and Prevention, Atlanta, GA, USA  
Susan Sanchez: Department of Infectious Diseases, College of Veterinary Medicine, University of Georgia, Athens, GA, USA  
Kenneth Bayles: Department of Pathology and Microbiology, University of Nebraska Medical Center, Omaha, NE, USA  
Ron Skurray, Neville Firth, Slade Jensen: School of Biological Sciences, University of Sydney, Sydney, AU  
Jodi Lindsay: Department of Cellular and

|          |         |       |         |                       |                                                                                          |                   |          |      |                                |  |                                   |                      |                                                                                                                                                                                                                                                                                                                                                                                  |
|----------|---------|-------|---------|-----------------------|------------------------------------------------------------------------------------------|-------------------|----------|------|--------------------------------|--|-----------------------------------|----------------------|----------------------------------------------------------------------------------------------------------------------------------------------------------------------------------------------------------------------------------------------------------------------------------------------------------------------------------------------------------------------------------|
|          |         |       |         |                       |                                                                                          |                   |          |      |                                |  | infection                         |                      | Molecular Medicine,<br>St. George's,<br>University of<br>London, London, UK<br>Kenneth Bayles:<br>Department of<br>Pathology and<br>Microbiology,<br>University of<br>Nebraska Medical<br>Center, Omaha, NE,<br>USA                                                                                                                                                              |
| GQ900407 | SAP049A | 25022 | NE 3868 | <i>S. aureus</i>      | <i>cadXD, sin, ΔTn552, aph, sta, aad, bacitracin resistance, mac, ery, repA, par</i>     | RT5<br>(RT3-like) | complete | 2007 | NE, USA                        |  | human<br>clinical<br>isolate, eye |                      | Ron Skurray, Neville<br>Firth, Slade Jensen:<br>School of Biological<br>Sciences, University<br>of Sydney, Sydney,<br>AU<br>Frances O'Brien.<br>School of Biomedical<br>Sciences, Curtin<br>University of<br>Technology, Perth,<br>Western Australia<br>Ron Skurray, Neville<br>Firth, Slade Jensen:<br>School of Biological<br>Sciences, University<br>of Sydney, Sydney,<br>AU |
| GQ900465 | SAP110A | 24711 | SK6536  | <i>S. epidermidis</i> | <i>aac, antiseptic resistance, bla, metal transport, repA, rep, par</i>                  | RT111             | complete | 2000 | Sydney,<br>Australia           |  | human<br>clinical<br>isolate      |                      | Ron Skurray, Neville<br>Firth, Slade Jensen:<br>School of Biological<br>Sciences, University<br>of Sydney, Sydney,<br>AU<br>Frances O'Brien.<br>School of Biomedical<br>Sciences, Curtin<br>University of<br>Technology, Perth,<br>Western Australia<br>Ron Skurray, Neville<br>Firth, Slade Jensen:<br>School of Biological<br>Sciences, University<br>of Sydney, Sydney,<br>AU |
| GQ900394 | pWBG752 | 24654 | WBG8404 | <i>S. aureus</i>      | <i>ars, cadXD, pre, sin, Tn552, bacteriocin, repA, rep, par</i>                          | RT13              | complete | 1995 | Remote<br>Western<br>Australia |  | screening                         | ST45-MRSA-V<br>(5C2) | Ron Skurray, Neville<br>Firth, Slade Jensen:<br>School of Biological<br>Sciences, University<br>of Sydney, Sydney,<br>AU<br>Ron Skurray, Neville<br>Firth, Slade Jensen:<br>School of Biological<br>Sciences, University<br>of Sydney, Sydney,<br>AU                                                                                                                             |
| GQ900458 | SAP108A | 24518 | SK85    | <i>S. epidermidis</i> | <i>aac, cadXD, antiseptic resistance, mac, ery, sin, metal transport, repA, rep, par</i> | RT108             | complete | 1980 | Melbourne,<br>Australia        |  | human<br>clinical<br>isolate      |                      | Ron Skurray, Neville<br>Firth, Slade Jensen:<br>School of Biological<br>Sciences, University<br>of Sydney, Sydney,<br>AU                                                                                                                                                                                                                                                         |
| GQ900444 | pSK76   | 23983 | SK1373  | <i>S. aureus</i>      | <i>ars, cadCA, mer, sin, ΔTn552, repA, par</i>                                           | RT94              | complete | 1960 | Melbourne,<br>Australia        |  | human<br>clinical<br>isolate      | AsaCdHgPc            | Ron Skurray, Neville<br>Firth, Slade Jensen:<br>School of Biological<br>Sciences, University<br>of Sydney, Sydney,<br>AU                                                                                                                                                                                                                                                         |

|          |         |       |         |                       |                                                                                                                                       |                 |          |           |                      |                               |          |                                                                                                                                                                                                                                                                                                                                                                                                                                                                                                        |
|----------|---------|-------|---------|-----------------------|---------------------------------------------------------------------------------------------------------------------------------------|-----------------|----------|-----------|----------------------|-------------------------------|----------|--------------------------------------------------------------------------------------------------------------------------------------------------------------------------------------------------------------------------------------------------------------------------------------------------------------------------------------------------------------------------------------------------------------------------------------------------------------------------------------------------------|
| GQ900462 | pSK105  | 23263 | SK356   | <i>S. epidermidis</i> | <i>aacA-aphD</i> , IS256 x2, antiseptic resistance, <i>sin</i> , <i>repA</i> , <i>par</i>                                             | RT109           | complete | 1980      | Melbourne, Australia | human clinical isolate        | QacAGmKm | Sciences, University of Sydney, Sydney, AU<br>Ron Skurray, Neville Firth, Slade Jensen: School of Biological Sciences, University of Sydney, Sydney, AU<br>Kenneth Bayles: Department of Pathology and Microbiology, University of Nebraska Medical Center, Omaha, NE, USA<br>Jodi Lindsay. Department of Cellular and Molecular Medicine, St. George's, University of London, London, UK<br>Ron Skurray, Neville Firth, Slade Jensen: School of Biological Sciences, University of Sydney, Sydney, AU |
| GQ900410 | SAP051A | 23059 | NE 3883 | <i>S. aureus</i>      | <i>cadXD</i> , <i>sin</i> , $\Delta$ Tn552, <i>aph</i> , <i>sta</i> , <i>aad</i> , <i>mac</i> , <i>ery</i> , <i>repA</i> , <i>par</i> | RT8 (RT3-like)  | complete | 2007      | NE, USA              | human clinical isolate, wound |          | Department of Pathology and Microbiology, University of Nebraska Medical Center, Omaha, NE, USA<br>Jodi Lindsay. Department of Cellular and Molecular Medicine, St. George's, University of London, London, UK<br>Ron Skurray, Neville Firth, Slade Jensen: School of Biological Sciences, University of Sydney, Sydney, AU                                                                                                                                                                            |
| GQ900416 | SAP060A | 22987 | 502A    | <i>S. aureus</i>      | <i>abiK</i> , <i>cadXD</i> , <i>ser</i> , <i>sej</i> , <i>sed</i> , <i>sin</i> , <i>repA</i> , <i>par</i>                             | RT29 (RT2-like) | complete | pre-1960s | USA                  | not from infection            | MSSA     | Department of Cellular and Molecular Medicine, St. George's, University of London, London, UK<br>Ron Skurray, Neville Firth, Slade Jensen: School of Biological Sciences, University of Sydney, Sydney, AU                                                                                                                                                                                                                                                                                             |
| GQ900446 | pSK62   | 22694 | SK1397  | <i>S. aureus</i>      | <i>ars</i> , Tn552 $\Delta$ , <i>cadCA</i> , <i>mer</i> , <i>sin</i> x2, <i>repA</i> , <i>par</i>                                     | RT95            | complete | 1967      | Melbourne, Australia | human clinical isolate        | AsaCdHg  | Department of Cellular and Molecular Medicine, St. George's, University of London, London, UK<br>Ron Skurray, Neville Firth, Slade Jensen: School of Biological Sciences, University of Sydney, Sydney, AU                                                                                                                                                                                                                                                                                             |
| GQ900435 | p5753cA | 21806 | 5753c   | <i>E. faecium</i>     | <i>cad</i> , <i>van</i> , bacteriocin, iron transport                                                                                 | RT116           | complete |           |                      | human clinical isolate        |          | Jean Patel, Ainsley Nicholson, Brandi Limbago: Division of                                                                                                                                                                                                                                                                                                                                                                                                                                             |

Healthcare Quality Promotion, Centers for Disease Control and Prevention, Atlanta, GA, USA  
 Frances O'Brien. School of Biomedical Sciences, Curtin University of Technology, Perth, Western Australia  
 Frances O'Brien. School of Biomedical Sciences, Curtin University of Technology, Perth, Western Australia  
 Jodi Lindsay. Department of Cellular and Molecular Medicine, St. George's, University of London, London, UK  
 Kenneth Bayles: Department of Pathology and Microbiology, University of Nebraska Medical Center, Omaha, NE, USA

|          |         |       |         |                  |                                                      |     |          |      |                          |                                        |                    |
|----------|---------|-------|---------|------------------|------------------------------------------------------|-----|----------|------|--------------------------|----------------------------------------|--------------------|
| GQ900467 | pWBG763 | 20730 | WBG8366 | <i>S. aureus</i> | <i>cadXD, pre, sin, Tn552, bacteriocin, rep, par</i> | RT1 | complete | 1995 | Remote Western Australia | screening                              | ST78-MRSA-IVa (2B) |
| GQ900397 | pWBG757 | 20730 | W17S    | <i>S. aureus</i> | <i>cadXD, pre, sin, Tn552, bacteriocin, rep, par</i> | RT1 | complete | 1995 | Remote Western Australia | screening                              | ST93-MSSA          |
| GQ900425 | SAP073A | 20729 | 207     | <i>S. aureus</i> | <i>cadXD, pre, sin, Tn552, bacteriocin, rep, par</i> | RT1 | complete | 1999 | Oxford, UK               | clinical, community-acquired infection | CA-MSSA            |
| GQ900413 | SAP053A | 20672 | NE 3890 | <i>S. aureus</i> | <i>cadXD, pre, sin, Tn552, bacteriocin, rep, par</i> | RT1 | complete | 2007 | NE, USA                  | human clinical isolate, wound          |                    |

|          |         |       |         |                       |                                                      |      |          |      |                          |                                        |                   |                                                                                                                                                                                                                          |
|----------|---------|-------|---------|-----------------------|------------------------------------------------------|------|----------|------|--------------------------|----------------------------------------|-------------------|--------------------------------------------------------------------------------------------------------------------------------------------------------------------------------------------------------------------------|
| GQ900392 | pWBG750 | 20653 | WBG8287 | <i>S. aureus</i>      | <i>cadXD, pre, sin, Tn552, bacteriocin, rep, par</i> | RT1  | complete | 1995 | Royal Perth Hospital, WA | clinical, community-acquired infection | ST1-MRSA-IVa (2B) | Frances O'Brien. School of Biomedical Sciences, Curtin University of Technology, Perth, Western Australia<br>Jodi Lindsay. Department of Cellular and Molecular Medicine, St. George's, University of London, London, UK |
| GQ900424 | SAP072A | 20653 | 30067   | <i>S. aureus</i>      | <i>cadXD, pre, sin, Tn552, bacteriocin, rep, par</i> | RT1  | complete | 2004 | UK                       | clinical, animal isolate               |                   | Jodi Lindsay. Department of Cellular and Molecular Medicine, St. George's, University of London, London, UK                                                                                                              |
| GQ900414 | SAP055A | 20453 | 434     | <i>S. aureus</i>      | <i>ars, cadXD, sin, repA, par</i>                    | RT24 | complete | 1999 | Oxford, UK               | clinical, community-acquired infection | CA-MSSA           | Ron Skurray, Neville Firth, Slade Jensen: School of Biological Sciences, University of Sydney, Sydney, AU                                                                                                                |
| GQ900453 | SAP105B | 16775 | SK933   | <i>S. epidermidis</i> | <i>sin, repA, par</i>                                | ND   | complete | 1946 | Melbourne, Australia     | human clinical isolate                 |                   | Ron Skurray, Neville Firth, Slade Jensen: School of Biological Sciences, University of Sydney, Sydney, AU                                                                                                                |
| GQ900449 | SAP099B | 16428 | SK1271  | <i>S. aureus</i>      | <i>ars, sin x2, repA, Type Ib partitioning</i>       | ND   | complete | 1951 | Melbourne, Australia     | human clinical isolate                 | AsaPcQacB         |                                                                                                                                                                                                                          |

Jodi Lindsay.  
 Department of  
 Cellular and  
 Molecular Medicine,  
 St. George's,  
 University of  
 London, London, UK  
 Ron Skurray, Neville  
 Firth, Slade Jensen:  
 School of Biological  
 Sciences, University  
 of Sydney, Sydney,  
 AU  
 Sobhan Nandi:  
 Department of  
 Microbiology,  
 University of  
 Georgia, Athens, GA,  
 USA  
 Ron Skurray, Neville  
 Firth, Slade Jensen:  
 School of Biological  
 Sciences, University  
 of Sydney, Sydney,  
 AU  
 Jean Patel, Ainsley  
 Nicholson, Brandi  
 Limbago: Division of  
 Healthcare Quality  
 Promotion, Centers  
 for Disease Control  
 and Prevention,  
 Atlanta, GA, USA

|          |         |       |         |                       |                                                      |    |          |      |                         |                              |                |
|----------|---------|-------|---------|-----------------------|------------------------------------------------------|----|----------|------|-------------------------|------------------------------|----------------|
| GQ900429 | SAP077B | 13342 | 879R4RF | <i>S. aureus</i>      | <i>traG</i> , possible ICE related<br>to ICE6013     | ND | complete | 1982 | USA                     | not from<br>infection        | MSSA           |
| GQ900457 | SAP107B | 10445 | SK30    | <i>S. epidermidis</i> | antiseptic resistance,<br><i>mob, sin, repA, par</i> | ND | complete | 1980 | Melbourne,<br>Australia | human<br>clinical<br>isolate |                |
| GQ900376 | SAP008A | 9968  | 693-2   | <i>S. sp.</i>         | <i>ars, mob, rep</i>                                 | ND | complete | 2001 | GA, USA                 | chicken litter<br>isolate    | int11-positive |
| GQ900455 | SAP106B | 8435  | SK939   | <i>S. epidermidis</i> | <i>mob x2, rep</i>                                   | ND | complete | 1946 | Melbourne,<br>Australia | human<br>clinical<br>isolate |                |
| GQ900384 | SAP018B | 8226  | CDC25   | <i>S. sp. (CNS)</i>   | <i>mob, rep</i>                                      | ND | complete | 2001 | AR, USA                 | human<br>clinical<br>isolate | OxR            |

|          |         |      |        |                          |                    |    |          |      |                         |                              |    |                                                                                                                          |
|----------|---------|------|--------|--------------------------|--------------------|----|----------|------|-------------------------|------------------------------|----|--------------------------------------------------------------------------------------------------------------------------|
| GQ900466 | SAP110B | 6794 | SK6536 | S.<br><i>epidermidis</i> | <i>rep remnant</i> | ND | complete | 2000 | Sydney,<br>Australia    | human<br>clinical<br>isolate |    | Ron Skurray, Neville<br>Firth, Slade Jensen:<br>School of Biological<br>Sciences, University<br>of Sydney, Sydney,<br>AU |
| GQ900459 | SAP108B | 6206 | SK85   | S.<br><i>epidermidis</i> | <i>mob x2, rep</i> | ND | complete | 1980 | Melbourne,<br>Australia | human<br>clinical<br>isolate |    | Ron Skurray, Neville<br>Firth, Slade Jensen:<br>School of Biological<br>Sciences, University<br>of Sydney, Sydney,<br>AU |
| GQ900463 | pSK103  | 4607 | SK356  | S.<br><i>epidermidis</i> | <i>mob, cat</i>    | ND | complete | 1980 | Melbourne,<br>Australia | human<br>clinical<br>isolate | Cm | Ron Skurray, Neville<br>Firth, Slade Jensen:<br>School of Biological<br>Sciences, University<br>of Sydney, Sydney,<br>AU |
| GQ900436 | SAP084A | 4595 | SK1064 | <i>S. aureus</i>         | <i>mob, cat</i>    | ND | complete | 1953 | Melbourne,<br>Australia | human<br>clinical<br>isolate | Cm | Ron Skurray, Neville<br>Firth, Slade Jensen:<br>School of Biological<br>Sciences, University<br>of Sydney, Sydney,<br>AU |
| GQ900440 | SAP089A | 4595 | SK1404 | <i>S. aureus</i>         | <i>mob, cat</i>    | ND | complete | 1966 | Melbourne,<br>Australia | human<br>clinical<br>isolate | Cm | Ron Skurray, Neville<br>Firth, Slade Jensen:<br>School of Biological<br>Sciences, University<br>of Sydney, Sydney,<br>AU |
| GQ900460 | SAP108C | 4572 | SK85   | S.<br><i>epidermidis</i> | <i>mob</i>         | ND | complete | 1980 | Melbourne,<br>Australia | human<br>clinical<br>isolate |    | Ron Skurray, Neville<br>Firth, Slade Jensen:<br>School of Biological                                                     |

Sciences, University of Sydney, Sydney, AU  
 Jodi Lindsay.  
 Department of Cellular and Molecular Medicine, St. George's, University of London, London, UK  
 Ron Skurray, Neville Firth, Slade Jensen: School of Biological Sciences, University of Sydney, Sydney, AU  
 Ron Skurray, Neville Firth, Slade Jensen: School of Biological Sciences, University of Sydney, Sydney, AU  
 Ron Skurray, Neville Firth, Slade Jensen: School of Biological Sciences, University of Sydney, Sydney, AU  
 Ron Skurray, Neville Firth, Slade Jensen: School of Biological Sciences, University of Sydney, Sydney, AU

|          |         |      |        |                  |                 |    |          |           |                      |                        |      |    |
|----------|---------|------|--------|------------------|-----------------|----|----------|-----------|----------------------|------------------------|------|----|
| GQ900417 | SAP060B | 4498 | 502A   | <i>S. aureus</i> | <i>pre, tet</i> | ND | complete | pre-1960s | USA                  | not from infection     | MSSA |    |
| GQ900437 | SAP085A | 4439 | SK1396 | <i>S. aureus</i> | <i>pre, tet</i> | ND | complete | 1965      | Melbourne, Australia | human clinical isolate |      | Tc |
| GQ900441 | SAP093A | 4439 | SK1529 | <i>S. aureus</i> | <i>pre, tet</i> | ND | complete | 1965      | Melbourne, Australia | human clinical isolate |      | Tc |
| GQ900443 | SAP094A | 4439 | SK449  | <i>S. aureus</i> | <i>pre, tet</i> | ND | complete | 1981      | Melbourne, Australia | human clinical isolate |      | Tc |
| GQ900445 | SAP095B | 4439 | SK1373 | <i>S. aureus</i> | <i>pre, tet</i> | ND | complete | 1960      | Melbourne, Australia | human clinical isolate |      | Tc |

AU

Ron Skurray, Neville Firth, Slade Jensen: School of Biological Sciences, University of Sydney, Sydney, AU

Susan Sanchez: Department of Infectious Diseases, College of Veterinary Medicine, University of Georgia, Athens, GA, USA

Kenneth Bayles: Department of Pathology and Microbiology, University of Nebraska Medical Center, Omaha, NE, USA

Kenneth Bayles: Department of Pathology and Microbiology, University of Nebraska Medical Center, Omaha, NE, USA

Ron Skurray, Neville

|          |         |      |               |                  |                              |    |          |      |                      |                               |              |
|----------|---------|------|---------------|------------------|------------------------------|----|----------|------|----------------------|-------------------------------|--------------|
| GQ900438 | SAP085B | 3961 | SK1396        | <i>S. aureus</i> | <i>pre, mac-linc-str-ery</i> | ND | complete | 1965 | Melbourne, Australia | human clinical isolate        | AsaCdHg      |
| GQ900404 | SAP046B | 3125 | VET A6-001648 | <i>S. aureus</i> |                              | ND | complete | 2005 | Clarke Co, GA, USA   | canine abscess isolate        | mec type IVh |
| GQ900408 | SAP049B | 3125 | NE 3868       | <i>S. aureus</i> |                              | ND | complete | 2007 | NE, USA              | human clinical isolate, eye   |              |
| GQ900411 | SAP051B | 3125 | NE 3883       | <i>S. aureus</i> |                              | ND | complete | 2007 | NE, USA              | human clinical isolate, wound |              |
| GQ900450 | SAP104A | 3011 | SK6575        | <i>S. aureus</i> |                              | ND | complete | 1998 | Bangkok,             | human                         |              |

|          |         |      |          |                       |                          |    |          |      |                          |                                        |                   |                                                                                                             |
|----------|---------|------|----------|-----------------------|--------------------------|----|----------|------|--------------------------|----------------------------------------|-------------------|-------------------------------------------------------------------------------------------------------------|
|          |         |      |          |                       |                          |    |          |      | Thailand                 | clinical isolate                       |                   | Firth, Slade Jensen: School of Biological Sciences, University of Sydney, Sydney, AU                        |
| GQ900423 | SAP070A | 3011 | S54      | <i>S. aureus</i>      |                          | ND | complete | 2003 | London, UK               | clinical, hospital-acquired infection  | HA-MRSA           | Jodi Lindsay. Department of Cellular and Molecular Medicine, St. George's, University of London, London, UK |
| GQ900420 | SAP065A | 2908 | EMRSA-10 | <i>S. aureus</i>      | <i>cat</i>               | ND | complete | 1987 | UK                       | clinical, hospital-acquired infection  | HA-MRSA           | Jodi Lindsay. Department of Cellular and Molecular Medicine, St. George's, University of London, London, UK |
| GQ900393 | pWBG751 | 2473 | WBG8287  | <i>S. aureus</i>      | <i>mac-linc-str-ery</i>  | ND | complete | 1995 | Royal Perth Hospital, WA | clinical, community-acquired infection | ST1-MRSA-IVa (2B) | Frances O'Brien. School of Biomedical Sciences, Curtin University of Technology, Perth, Western Australia   |
| GQ900461 | SAP108D | 2422 | SK85     | <i>S. epidermidis</i> |                          | ND | complete | 1980 | Melbourne, Australia     | human clinical isolate                 |                   | Ron Skurray, Neville Firth, Slade Jensen: School of Biological Sciences, University of Sydney, Sydney, AU   |
| GQ900464 | pSK108  | 2418 | SK356    | <i>S. epidermidis</i> | <i>smr, partial qacC</i> | ND | complete | 1980 | Melbourne, Australia     | human clinical                         | QacC              | Ron Skurray, Neville Firth, Slade Jensen:                                                                   |

|          |         |      |         |                  |                  |    |          |      |                          |  |                                        |                    |                                                                                                             |
|----------|---------|------|---------|------------------|------------------|----|----------|------|--------------------------|--|----------------------------------------|--------------------|-------------------------------------------------------------------------------------------------------------|
|          |         |      |         |                  |                  |    |          |      |                          |  | isolate                                |                    | School of Biological Sciences, University of Sydney, Sydney, AU                                             |
| GQ900431 | SAP078B | 2415 | A78R1   | <i>S. aureus</i> | mac-linc-str-ery | ND | complete | 2007 | UK                       |  | not from infection                     | MRSA               | Jodi Lindsay. Department of Cellular and Molecular Medicine, St. George's, University of London, London, UK |
| GQ900468 | pWBG764 | 2397 | WBG8366 | <i>S. aureus</i> |                  | ND | complete | 1995 | Remote Western Australia |  | screening                              | ST78-MRSA-IVa (2B) | Frances O'Brien. School of Biomedical Sciences, Curtin University of Technology, Perth, Western Australia   |
| GQ900439 | SAP087A | 2396 | SK1020  | <i>S. aureus</i> |                  | ND | complete | 1947 | Melbourne, Australia     |  | human clinical isolate                 | AsaCdHg            | Ron Skurray, Neville Firth, Slade Jensen: School of Biological Sciences, University of Sydney, Sydney, AU   |
| GQ900396 | pWBG754 | 2241 | WA8     | <i>S. aureus</i> | multidrug efflux | ND | complete | 2003 | Royal Perth Hospital, WA |  | clinical, community-acquired infection | ST75-MRSA-IVa (2B) | School of Biomedical Sciences, Curtin University of Technology, Perth, Western Australia                    |
| GQ900451 | SAP104B | 1552 | SK6575  | <i>S. aureus</i> |                  | ND | complete | 1998 | Bangkok, Thailand        |  | human clinical isolate                 |                    | Ron Skurray, Neville Firth, Slade Jensen: School of Biological Sciences, University                         |



|          |         |       |          |                  |                                                                                        |      |                               |      |                         |                                                 |              |                                                                                                                               |
|----------|---------|-------|----------|------------------|----------------------------------------------------------------------------------------|------|-------------------------------|------|-------------------------|-------------------------------------------------|--------------|-------------------------------------------------------------------------------------------------------------------------------|
| GQ900491 | pSK23   | 41993 | SK654    | <i>S. aureus</i> | <i>bin x2, bla, cadCA, cadXD, mer, sin, aacA-aphD, antiseptic resistance, IS256 x2</i> | RT91 | partial, single<br>gap ~20 bp | 1981 | Hobart,<br>Australia    | human<br>clinical<br>isolate                    | CdHgQacBGmKm | Ron Skurray, Neville<br>Firth, Slade Jensen:<br>School of Biological<br>Sciences, University<br>of Sydney, Sydney,<br>AU      |
| GQ900490 | pSK21   | 37046 | SK413    | <i>S. aureus</i> | <i>cadCA, cadXD, mer, sin, antiseptic resistance, ΔTn552</i>                           | RT90 | partial, single<br>gap ~20 bp | 1981 | Melbourne,<br>Australia | human<br>clinical<br>isolate                    | CdHgPcQacB   | Ron Skurray, Neville<br>Firth, Slade Jensen:<br>School of Biological<br>Sciences, University<br>of Sydney, Sydney,<br>AU      |
| GQ900489 | pSK79   | 35850 | SK1215   | <i>S. aureus</i> | <i>ars, cadCA, cadXD, mer, sin x2, ΔTn552</i>                                          | RT87 | partial, single<br>gap ~20 bp | 1953 | Melbourne,<br>Australia | human<br>clinical<br>isolate                    | AsaCdHgPc    | Ron Skurray, Neville<br>Firth, Slade Jensen:<br>School of Biological<br>Sciences, University<br>of Sydney, Sydney,<br>AU      |
| GQ900488 | pSK59   | 29570 | SK1396   | <i>S. aureus</i> | <i>ars, cadCA, cadXD, mer, sin x2, Tn552Δ</i>                                          | RT86 | partial, single<br>gap ~20 bp | 1965 | Melbourne,<br>Australia | human<br>clinical<br>isolate                    | AsaCdHg      | Ron Skurray, Neville<br>Firth, Slade Jensen:<br>School of Biological<br>Sciences, University<br>of Sydney, Sydney,<br>AU      |
| GQ900484 | SAP070B | 29531 | S54      | <i>S. aureus</i> | <i>antiseptic resistance, cadCA, cadXD, mer, sin, Tn552Δ</i>                           | RT42 | partial, single<br>gap ~20 bp | 2003 | London, UK              | clinical,<br>hospital-<br>acquired<br>infection | HA-MRSA      | Jodi Lindsay.<br>Department of<br>Cellular and<br>Molecular Medicine,<br>St. George's,<br>University of<br>London, London, UK |
| GQ900482 | SAP066A | 32122 | EMRSA-17 | <i>S. aureus</i> | <i>cadCA, cadXD, mer, sin, antiseptic resistance,</i>                                  | RT39 | partial, single<br>gap ~20 bp | 2000 | UK                      | clinical,<br>hospital-                          | HA-MRSA      | Jodi Lindsay.<br>Department of                                                                                                |

| Accession | Strain  | Year  | Source   | Species          | Genetic Elements                                  | Insertion Site | Insertion Type             | Year | Location                 | Context                                | Strain Type  | Researcher/Institution                                                                                                                                                                                          |
|-----------|---------|-------|----------|------------------|---------------------------------------------------|----------------|----------------------------|------|--------------------------|----------------------------------------|--------------|-----------------------------------------------------------------------------------------------------------------------------------------------------------------------------------------------------------------|
|           |         |       |          |                  | $\Delta$ Tn552, IS256                             |                |                            |      |                          | acquired infection                     |              | Cellular and Molecular Medicine, St. George's, University of London, London, UK<br>Jodi Lindsay.<br>Department of Cellular and Molecular Medicine, St. George's, University of London, London, UK               |
| GQ900481  | SAP065B | 26750 | EMRSA-10 | <i>S. aureus</i> | <i>ars, cadCA, cadXD, sin, Tn552, bin</i>         | RT36           | partial, single gap ~20 bp | 1987 | UK                       | clinical, hospital-acquired infection  | HA-MRSA      | Department of Cellular and Molecular Medicine, St. George's, University of London, London, UK<br>Jodi Lindsay.<br>Department of Cellular and Molecular Medicine, St. George's, University of London, London, UK |
| GQ900480  | SAP059A | 26243 | 3172     | <i>S. aureus</i> | <i>cadXD, sin, sdrE, pls</i>                      | RT28           | partial, single gap ~20 bp | 1999 | Oxford, UK               | not from infection                     | MSSA         | Department of Cellular and Molecular Medicine, St. George's, University of London, London, UK<br>Frances O'Brien.<br>School of Biomedical Sciences, Curtin University of Technology, Perth, Western Australia   |
| GQ900475  | pWBG762 | 54023 | K102N    | <i>S. aureus</i> | <i>cadXD, pre, se x2, sin, Tn552, bacteriocin</i> | RT22           | partial, single gap ~20 bp | 1995 | Remote Western Australia | screening                              | ST508-MSSA   | Frances O'Brien.<br>School of Biomedical Sciences, Curtin University of Technology, Perth, Western Australia                                                                                                    |
| GQ900472  | pWBG756 | 24456 | WSPP     | <i>S. aureus</i> | <i>cadXD, sin, Tn552</i>                          | RT18           | partial, single gap ~20 bp | 2002 | Royal Perth Hospital, WA | clinical, community-acquired infection | ST30-MRSA-IV | University of Technology, Perth, Western Australia                                                                                                                                                              |

|          |                  |       |        |                           |                                                 |       |                               |      |                             |                                                  |                       |                                                                                                                                                                                                                                                                                                                                                                                                                                    |
|----------|------------------|-------|--------|---------------------------|-------------------------------------------------|-------|-------------------------------|------|-----------------------------|--------------------------------------------------|-----------------------|------------------------------------------------------------------------------------------------------------------------------------------------------------------------------------------------------------------------------------------------------------------------------------------------------------------------------------------------------------------------------------------------------------------------------------|
| GQ900471 | pWBG755          | 25607 | WA8    | <i>S. aureus</i>          | <i>cadXD, sin, ΔTn552</i>                       | RT117 | partial, single<br>gap ~20 bp | 2003 | Royal Perth<br>Hospital, WA | clinical,<br>community-<br>acquired<br>infection | ST75-MRSA-IVa<br>(2B) | Frances O'Brien.<br>School of Biomedical<br>Sciences, Curtin<br>University of<br>Technology, Perth,<br>Western Australia<br>Jean Patel, Ainsley<br>Nicholson, Brandi<br>Limbago: Division of<br>Healthcare Quality<br>Promotion, Centers<br>for Disease Control<br>and Prevention,<br>Atlanta, GA, USA<br>Ron Skurray, Neville<br>Firth, Slade Jensen:<br>School of Biological<br>Sciences, University<br>of Sydney, Sydney,<br>AU |
| GQ900469 | SAP024A          | 47352 | CDC19  | <i>S.<br/>epidermidis</i> | <i>cadXD, mob, sin</i>                          | RT48  | partial, single<br>gap ~20 bp | 1998 | WI, USA                     | human<br>clinical<br>isolate                     | OxR                   | Ron Skurray, Neville<br>Firth, Slade Jensen:<br>School of Biological<br>Sciences, University<br>of Sydney, Sydney,<br>AU                                                                                                                                                                                                                                                                                                           |
| GQ915272 | pSK53            | 24475 | SK1700 | <i>S. aureus</i>          | Tn552, <i>tra1</i> , possible ICE               | ND    | partial                       | 1975 | Melbourne,<br>Australia     | human<br>clinical<br>isolate                     | CdHgPc                | Ron Skurray, Neville<br>Firth, Slade Jensen:<br>School of Biological<br>Sciences, University<br>of Sydney, Sydney,<br>AU                                                                                                                                                                                                                                                                                                           |
| GQ915271 | phage<br>SAP090B | 26877 | SK1700 | <i>S. aureus</i>          | only phage genes                                | ND    | partial                       | 1975 | Melbourne,<br>Australia     | human<br>clinical<br>isolate                     |                       | Ron Skurray, Neville<br>Firth, Slade Jensen:<br>School of Biological<br>Sciences, University<br>of Sydney, Sydney,<br>AU                                                                                                                                                                                                                                                                                                           |
| GQ915270 | pSK53            | 38886 | SK1700 | <i>S. aureus</i>          | <i>cadCA, cadXD, mer, qaca,<br/>sin, ΔTn552</i> | ND    | partial                       | 1975 | Melbourne,<br>Australia     | human<br>clinical<br>isolate                     | CdHgPc                | Ron Skurray, Neville<br>Firth, Slade Jensen:<br>School of Biological<br>Sciences, University<br>of Sydney, Sydney,<br>AU                                                                                                                                                                                                                                                                                                           |

|          |         |       |         |                  |                                                 |      |         |      |                          |                                  |                   |                                                                                                           |
|----------|---------|-------|---------|------------------|-------------------------------------------------|------|---------|------|--------------------------|----------------------------------|-------------------|-----------------------------------------------------------------------------------------------------------|
| GQ915269 | pSK73   | 39907 | SK1404  | <i>S. aureus</i> | mac-linc-str-ery, aad                           | RT88 | partial | 1966 | Melbourne, Australia     | human clinical isolate           | AsaCdHg           | Ron Skurray, Neville Firth, Slade Jensen: School of Biological Sciences, University of Sydney, Sydney, AU |
| GQ915268 | pSK64   | 34784 | SK1020  | <i>S. aureus</i> | ars, cadCA, cadXD, mer, sin, Tn552Δ             | RT87 | partial | 1947 | Melbourne, Australia     | human clinical isolate           | AsaCdHg           | Ron Skurray, Neville Firth, Slade Jensen: School of Biological Sciences, University of Sydney, Sydney, AU |
| GQ915267 | pSK60   | 35175 | SK1011  | <i>S. aureus</i> | ars, cadCA, cadXD, mer, sin, ΔTn552             | RT87 | partial | 1947 | Melbourne, Australia     | human clinical isolate           | AsaCdHgPc         | Ron Skurray, Neville Firth, Slade Jensen: School of Biological Sciences, University of Sydney, Sydney, AU |
| GQ915266 | pSK74   | 35327 | SK1064  | <i>S. aureus</i> | ars, cadCA, cadXD, mer, Tn552, bin, blaI, blaR1 | RT85 | partial | 1953 | Melbourne, Australia     | human clinical isolate           | AsaCdHgPc         | Ron Skurray, Neville Firth, Slade Jensen: School of Biological Sciences, University of Sydney, Sydney, AU |
| GQ915265 | pWBG748 | 44964 | WBG8381 | <i>S. aureus</i> | bla, tra (incomplete)                           | RT9  | partial | 1995 | Remote Western Australia | screening human clinical isolate | ST5-MRSA-IVa (2B) | Frances O'Brien. School of Biomedical Sciences, Curtin University of Technology, Perth, Western Australia |
| GQ915264 | SAP015B | 7069  | CDC61   | <i>S. aureus</i> |                                                 | RT50 | partial | 2002 | CA, USA                  | human clinical isolate           | HA-MRSA           | Jean Patel, Ainsley Nicholson, Brandi Limbago: Division of                                                |

Healthcare Quality Promotion, Centers for Disease Control and Prevention, Atlanta, GA, USA  
 Jean Patel, Ainsley Nicholson, Brandi Limbago: Division of Healthcare Quality Promotion, Centers for Disease Control and Prevention, Atlanta, GA, USA  
 Ron Skurray, Neville Firth, Slade Jensen: School of Biological Sciences, University of Sydney, Sydney, AU  
 Ron Skurray, Neville Firth, Slade Jensen: School of Biological Sciences, University of Sydney, Sydney, AU  
 Ron Skurray, Neville Firth, Slade Jensen: School of Biological Sciences, University of Sydney, Sydney, AU  
 Ron Skurray, Neville Firth, Slade Jensen: School of Biological Sciences, University of Sydney, Sydney, AU

|          |             |       |        |                  |                                                              |      |         |      |                      |                        |              |
|----------|-------------|-------|--------|------------------|--------------------------------------------------------------|------|---------|------|----------------------|------------------------|--------------|
| GQ915263 | SAP015B     | 12605 | CDC61  | <i>S. aureus</i> | <i>tra</i> (incomplete), possible ICE                        | RT50 | partial | 2002 | CA, USA              | human clinical isolate | HA-MRSA      |
| GQ900515 | SAP102B     | 1858  | SK6523 | <i>S. aureus</i> |                                                              | ND   | partial | 2000 | Sydney, Australia    | human clinical isolate |              |
| GQ900514 | pSK17       | 7929  | SK707  | <i>S. aureus</i> | <i>sin</i> , <i>aacA-aphD</i> , antiseptic resistance, IS256 | RT96 | partial | 1981 | Melbourne, Australia | human clinical isolate | PcQacAGmKmTp |
| GQ900513 | pSK17 phage | 9968  | SK707  | <i>S. aureus</i> |                                                              | RT96 | partial | 1981 | Melbourne, Australia | human clinical isolate | PcQacAGmKmTp |
| GQ900512 | SAP090D     | 10726 | SK1700 | <i>S. aureus</i> | only phage genes                                             | ND   | partial | 1975 | Melbourne, Australia | human clinical isolate |              |

|          |         |      |         |                  |                              |      |         |      |                 |                                       |         |                                                                                                             |
|----------|---------|------|---------|------------------|------------------------------|------|---------|------|-----------------|---------------------------------------|---------|-------------------------------------------------------------------------------------------------------------|
|          |         |      |         |                  |                              |      |         |      |                 | isolate                               |         | School of Biological Sciences, University of Sydney, Sydney, AU                                             |
| GQ900511 | SAP076B | 1979 | PM86    | <i>S. aureus</i> |                              | ND   | partial | 1999 | SGH, London, UK | not from infection                    | HA-MRSA | Jodi Lindsay. Department of Cellular and Molecular Medicine, St. George's, University of London, London, UK |
| GQ900510 | SAP067B | 1415 | PM62    | <i>S. aureus</i> |                              | ND   | partial | 1999 | SGH, London, UK | clinical, hospital-acquired infection | HA-MRSA | Jodi Lindsay. Department of Cellular and Molecular Medicine, St. George's, University of London, London, UK |
| GQ900509 | SAP062D | 4764 | EMRSA-1 | <i>S. aureus</i> | antiseptic resistance, IS256 | RT33 | partial | 1984 | UK              | clinical, hospital-acquired infection | HA-MRSA | Jodi Lindsay. Department of Cellular and Molecular Medicine, St. George's, University of London, London, UK |
| GQ900508 | SAP062C | 6516 | EMRSA-1 | <i>S. aureus</i> | <i>mob</i> , IS256           | RT33 | partial | 1984 | UK              | clinical, hospital-acquired infection | HA-MRSA | Jodi Lindsay. Department of Cellular and Molecular Medicine, St. George's, University of London, London, UK |

|          |         |       |         |                       |                   |      |         |      |         |                                                 |         |
|----------|---------|-------|---------|-----------------------|-------------------|------|---------|------|---------|-------------------------------------------------|---------|
| GQ900507 | SAP062B | 9840  | EMRSA-1 | <i>S. aureus</i>      | Tn552, <i>sin</i> | RT33 | partial | 1984 | UK      | clinical,<br>hospital-<br>acquired<br>infection | HA-MRSA |
| GQ900506 | SAP062A | 10083 | EMRSA-1 | <i>S. aureus</i>      |                   | RT33 | partial | 1984 | UK      | clinical,<br>hospital-<br>acquired<br>infection | HA-MRSA |
| GQ900505 | SAP024B | 14823 | CDC19   | <i>S. epidermidis</i> | <i>mob, dfr</i>   | ND   | partial | 1998 | WI, USA | human<br>clinical<br>isolate                    | OxR     |
| GQ900504 | SAP015B | 2712  | CDC61   | <i>S. aureus</i>      |                   | RT50 | partial | 2002 | CA, USA | human<br>clinical<br>isolate                    | HA-MRSA |
| GQ900503 | SAP015B | 2993  | CDC61   | <i>S. aureus</i>      |                   | RT50 | partial | 2002 | CA, USA | human<br>clinical<br>isolate                    | HA-MRSA |

Jodi Lindsay.  
Department of  
Cellular and  
Molecular Medicine,  
St. George's,  
University of  
London, London, UK

Jodi Lindsay.  
Department of  
Cellular and  
Molecular Medicine,  
St. George's,  
University of  
London, London, UK

Jean Patel, Ainsley  
Nicholson, Brandi  
Limbago: Division of  
Healthcare Quality  
Promotion, Centers  
for Disease Control  
and Prevention,  
Atlanta, GA, USA

Jean Patel, Ainsley  
Nicholson, Brandi  
Limbago: Division of  
Healthcare Quality  
Promotion, Centers  
for Disease Control  
and Prevention,  
Atlanta, GA, USA

Jean Patel, Ainsley  
Nicholson, Brandi  
Limbago: Division of

Healthcare Quality Promotion, Centers for Disease Control and Prevention, Atlanta, GA, USA  
 Jean Patel, Ainsley Nicholson, Brandi Limbago: Division of Healthcare Quality Promotion, Centers for Disease Control and Prevention, Atlanta, GA, USA  
 Jean Patel, Ainsley Nicholson, Brandi Limbago: Division of Healthcare Quality Promotion, Centers for Disease Control and Prevention, Atlanta, GA, USA  
 Jean Patel, Ainsley Nicholson, Brandi Limbago: Division of Healthcare Quality Promotion, Centers for Disease Control and Prevention, Atlanta, GA, USA  
 Ron Skurray, Neville Firth, Slade Jensen: School of Biological Sciences, University

|          |         |       |       |                       |                                         |      |         |      |                      |                        |         |
|----------|---------|-------|-------|-----------------------|-----------------------------------------|------|---------|------|----------------------|------------------------|---------|
| GQ900502 | SAP015B | 6774  | CDC61 | <i>S. aureus</i>      | lincosamide resistance                  | RT50 | partial | 2002 | CA, USA              | human clinical isolate | HA-MRSA |
| GQ900501 | SAP015B | 9066  | CDC61 | <i>S. aureus</i>      | <i>res</i>                              | RT50 | partial | 2002 | CA, USA              | human clinical isolate | HA-MRSA |
| GQ900500 | SAP015B | 21860 | CDC61 | <i>S. aureus</i>      | <i>tra, aacA-aphD, kan, IS256</i><br>x2 | RT50 | partial | 2002 | CA, USA              | human clinical isolate | HA-MRSA |
| GQ900499 | pSK101  | 4256  | SK356 | <i>S. epidermidis</i> | <i>tet</i>                              | ND   | partial | 1980 | Melbourne, Australia | human clinical isolate |         |

|          |         |       |        |                   |                                                                                                    |       |         |      |                      |                        |      |                                                                                                                                                                                                                                                                    |
|----------|---------|-------|--------|-------------------|----------------------------------------------------------------------------------------------------|-------|---------|------|----------------------|------------------------|------|--------------------------------------------------------------------------------------------------------------------------------------------------------------------------------------------------------------------------------------------------------------------|
| GQ900498 | SAP104C | 29343 | SK6575 | <i>S. aureus</i>  | <i>bin, cadCA, cadXD, mer, sin</i> , antiseptic resistance, IS256                                  | RT101 | partial | 1998 | Bangkok, Thailand    | human clinical isolate |      | of Sydney, Sydney, AU<br>Ron Skurray, Neville Firth, Slade Jensen: School of Biological Sciences, University of Sydney, Sydney, AU                                                                                                                                 |
| GQ900496 | SAP102A | 36082 | SK6523 | <i>S. aureus</i>  | <i>ars, bin, cadCA, sin, pre</i> , biofilm-associated protein, metal transport                     | RT99  | partial | 2000 | Sydney, Australia    | human clinical isolate |      | Ron Skurray, Neville Firth, Slade Jensen: School of Biological Sciences, University of Sydney, Sydney, AU                                                                                                                                                          |
| GQ900494 | pSK77   | 27694 | SK1499 | <i>S. aureus</i>  | <i>sin, dfr, aacA-aphD</i> , antiseptic resistance, IS256 x2                                       | RT96  | partial | 1965 | Melbourne, Australia | human clinical isolate | CdPc | Ron Skurray, Neville Firth, Slade Jensen: School of Biological Sciences, University of Sydney, Sydney, AU<br>Jean Patel, Ainsley Nicholson, Brandi Limbago: Division of Healthcare Quality Promotion, Centers for Disease Control and Prevention, Atlanta, GA, USA |
| GQ900487 | p5753cB | 56689 | 5753c  | <i>E. faecium</i> | <i>sin, aac, aph, aad, sta, mac-linc-str</i> , bacteriocin, iron transport, IS256, <i>mob, tet</i> | RT116 | partial |      |                      | human clinical isolate |      | Jodi Lindsay. Department of Cellular and Molecular Medicine, St. George's,                                                                                                                                                                                         |
| GQ900486 | SAP075A | 37050 | B111   | <i>S. aureus</i>  | <i>ars, bin, cadCA, pre, sin</i> , metal transport, biofilm-associated protein                     | RT30  | partial | 1992 | London, UK           |                        | MSSA | St. George's,                                                                                                                                                                                                                                                      |

University of  
London, London, UK

Jodi Lindsay.  
Department of  
Cellular and  
Molecular Medicine,  
St. George's,  
University of  
London, London, UK  
Jodi Lindsay.

Department of  
Cellular and  
Molecular Medicine,  
St. George's,  
University of  
London, London, UK  
Jodi Lindsay.

Department of  
Cellular and  
Molecular Medicine,  
St. George's,  
University of  
London, London, UK  
Jodi Lindsay.

Department of  
Cellular and  
Molecular Medicine,  
St. George's,  
University of  
London, London, UK  
Jodi Lindsay.

|          |         |       |        |                  |                                                                                      |      |         |      |                    |                                                 |         |
|----------|---------|-------|--------|------------------|--------------------------------------------------------------------------------------|------|---------|------|--------------------|-------------------------------------------------|---------|
| GQ900485 | SAP071A | 26883 | C00704 | <i>S. aureus</i> | <i>pls, abiK, cadXD, sin,</i><br>$\Delta$ Tn552                                      | RT20 | partial | 2004 | UK                 | clinical,<br>animal<br>isolate                  |         |
| GQ900483 | SAP067A | 37206 | PM62   | <i>S. aureus</i> | <i>ars, bin, cadCA, pre, sin,</i><br>metal transport, biofilm-<br>associated protein | RT40 | partial | 1999 | SGH, London,<br>UK | clinical,<br>hospital-<br>acquired<br>infection | HA-MRSA |
| GQ900479 | SAP058A | 22439 | 3134   | <i>S. aureus</i> | <i>abiK, cadXD, sin, pls</i>                                                         | RT27 | partial | 1999 | Oxford, UK         | not from<br>infection                           | MSSA    |
| GQ900478 | SAP056A | 27128 | 3041   | <i>S. aureus</i> | <i>cadXD</i> , biofilm-associated<br>protein                                         | RT25 | partial | 1999 | Oxford, UK         | not from<br>infection                           | MSSA    |

|          |         |       |       |                       |                                                      |      |         |      |                                |                                                  |                |                                                                                                                                                                            |
|----------|---------|-------|-------|-----------------------|------------------------------------------------------|------|---------|------|--------------------------------|--------------------------------------------------|----------------|----------------------------------------------------------------------------------------------------------------------------------------------------------------------------|
| GQ900477 | SAP054A | 37475 | 49    | <i>S. aureus</i>      | <i>ars, bin, cadCA, pre, sin,</i><br>metal transport | RT23 | partial | 1999 | Oxford, UK                     | clinical,<br>community-<br>acquired<br>infection | CA-MSSA        | Jodi Lindsay.<br>Department of<br>Cellular and<br>Molecular Medicine,<br>St. George's,<br>University of<br>London, London, UK                                              |
| GQ900476 | SAP044A | 36242 | 693-7 | <i>S. sp. (CNS)</i>   | <i>cadXD, pre,</i> bacitracin<br>resistance          | RT59 | partial | 2001 | GA, USA                        | chicken litter<br>isolate                        | int11-positive | Sobhan Nandi:<br>Department of<br>Microbiology,<br>University of<br>Georgia, Athens, GA,<br>USA                                                                            |
| GQ900474 | pWBG761 | 26838 | C33S  | <i>S. aureus</i>      | <i>abiK, cadXD, sin, pls,</i><br>$\Delta$ Tn552      | RT20 | partial | 1995 | Remote<br>Western<br>Australia | screening                                        | ST12-MSSA      | Frances O'Brien.<br>School of Biomedical<br>Sciences, Curtin<br>University of<br>Technology, Perth,<br>Western Australia                                                   |
| GQ900473 | pWBG760 | 4412  | C57S  | <i>S. aureus</i>      |                                                      | ND   | partial | 1995 | Remote<br>Western<br>Australia | screening                                        | ST20-MSSA      | Frances O'Brien.<br>School of Biomedical<br>Sciences, Curtin<br>University of<br>Technology, Perth,<br>Western Australia                                                   |
| GQ900470 | SAP025A | 35220 | CDC2  | <i>S. epidermidis</i> | <i>bin, sin, sdrE</i>                                | RT57 | partial | 1996 | SC, USA                        | human<br>clinical<br>isolate                     | OxS            | Jean Patel, Ainsley<br>Nicholson, Brandi<br>Limbago: Division of<br>Healthcare Quality<br>Promotion, Centers<br>for Disease Control<br>and Prevention,<br>Atlanta, GA, USA |

<sup>a</sup> Complete sequences are sorted first by descending size, then partial sequences with a single gap by size, then partial sequences by descending accession number

<sup>b</sup> Selected genotype highlights, not an all-inclusive list of genes:

Tn552 = *p271*, *p480* (or Tn552 transposase), *bin*, *blaI*, *blaR1*, *blaZ*

$\Delta$ Tn552 = *bin*, *blaI*, *blaR1*, *blaZ*

Tn552 $\Delta$  = *p271*, *p480* (or Tn552 transposase), *bin*

IS256 = IS256 transposase

*aac* = aminoglycoside N-acetyltransferase

*aacA-aphD* = aminoglycoside resistance

*aad* = aminoglycoside 6-adenylyltransferase

*aph* = Aminoglycoside 3'-phosphotransferase (Kanamycin kinase, type III) (Neomycin-kanamycin phosphotransferase type III)

*asp/sec* = secretion of virulence glycoproteins

*bla* = *blaI*, *blaR1*, *blaZ*

*ble* = bleomycin resistance

*cad* = cadmium resistance: *cadD*, *cadX*, *cadC*, *cadA*

*cat* = chloramphenicol acetyltransferase

*dfr* = dihydrofolate reductase

*ery* = erythromycin resistance

*etb* = exfoliatin B

*exo* = exoenzyme C3 precursor

*kan* = kanamycin resistance

*mac* = macrolide resistance

*mac-linc-str* = rRNA adenine N-6-methyltransferase (Macrolide-lincosamide-streptogramin B resistance protein)

*mob* = mobilization gene(s)

*par* = pSK1-type plasmid partitioning; only identified for complete sequences

*pls* = antiadhesin PIs, binding to squamous nasal epithelial cells

*pre* = plasmid recombination enzyme, relaxase

*qacA* or *qacC* = antiseptic resistance

*repA* = N-type replication initiation; only identified for complete sequences

*rep* = pSK639-type replication; only identified for complete sequences

*sdrE* = adhesin protein

*se* = staphylococcal enterotoxin

*smr* = multidrug efflux protein

*sta* = streptothricin acetyltransferase

*tcaA* = teicoplanin resistance

*tet* = tetracycline resistance

*tra* = conjugative transfer loci

Type Ib and II partitioning only identified for complete sequences

<sup>c</sup> OxR/S = oxacillin resistant/sensitive

CA = community-associated  
HA = hospital-associated  
MRSA = methicillin resistant *Staphylococcus aureus*  
MSSA = methicillin sensitive *Staphylococcus aureus*  
ST = MLST sequence type

<sup>d</sup> Previously determined plasmid phenotypes

Asa = arsenate/arsenite  
Cd = cadmium  
Cm = chloramphenicol  
Gm = gentamycin  
Hg = mercury  
Km = kanamycin  
Pc = penicillin  
QacA/B/C = quaternary ammonium antiseptic  
Tc = tetracycline  
Tp = trimethoprim

**Table S3 Large plasmid content of newly screened *Staphylococcus* strains**

|                                   | Number of strains (%) |
|-----------------------------------|-----------------------|
| Total newly examined <sup>a</sup> | 247                   |
| 1 or more plasmids >20kb          | 194 (78.5%)           |
| Only <20kb plasmids               | 25 (10.1%)            |
| No plasmids                       | 28 (11.3%)            |

<sup>a</sup> These strains were not previously examined for plasmid content
