# Supplementary material for: Major Families of Multiresistant Plasmids from Geographically and Epidemiologically Diverse Staphylococci
Source: PubMed Central journal article supplement (PMC3276174; doi:10.1534/g3.111.000760), 2011-12-01
Supplement: supp_1.7.581_TableS1.pdf [file supp_1.7.581_TableS1.pdf]

**Table S1 Strain collections used in this work**

| Strain collection  | Source                                                    | Description                                          | Number screened |
|--------------------|-----------------------------------------------------------|------------------------------------------------------|-----------------|
| NARSA <sup>a</sup> | NARSA <sup>a</sup> , US                                   | Human clinical                                       | 10              |
| CDC <sup>b</sup>   | Centers for Disease Control and Prevention, US            | Human clinical                                       | 64 <sup>b</sup> |
| Veterinary         | University of Georgia, GA, US                             | Companion animal                                     | 14              |
| Poultry            | University of Georgia, GA, US                             | Poultry litter                                       | 8               |
| Nebraska           | University of Nebraska Medical Center, NE, US             | Human clinical                                       | 51              |
| Western Australia  | Curtin University of Technology, Perth, Western Australia | Human clinical                                       | 35              |
| United Kingdom     | University of London, London, UK                          | Human and animal clinical, screenings and infections | 65              |
| Historic           | University of Sydney, Sydney, AU                          | Human clinical                                       | 29              |
| <b>Total</b>       |                                                           |                                                      | <b>280</b>      |

<sup>a</sup> Network on Antimicrobial Resistance in *Staphylococcus aureus* (NARSA) (<http://www.narsa.net>)

<sup>b</sup> There were four additional transconjugant strains with plasmids from human clinical strains in this collection (McDougal *et al.* 2008).
