# Supplementary material for: Major Families of Multiresistant Plasmids from Geographically and Epidemiologically Diverse Staphylococci
Source: PubMed Central journal article supplement (PMC3276174; doi:10.1534/g3.111.000760), 2011-12-01
Supplement: supp_1.7.581_TableS3.pdf [file supp_1.7.581_TableS3.pdf]

**Table S3 Large plasmid content of newly screened *Staphylococcus* strains**

|                                   | Number of strains (%) |
|-----------------------------------|-----------------------|
| Total newly examined <sup>a</sup> | 247                   |
| 1 or more plasmids >20kb          | 194 (78.5%)           |
| Only <20kb plasmids               | 25 (10.1%)            |
| No plasmids                       | 28 (11.3%)            |

<sup>a</sup> These strains were not previously examined for plasmid content
